# Supplementary material
Source: publisher figshare collection journal article supplement (https://tandf.figshare.com/ndownloader/files/14991206)
Supplement: Supplementary file 1 [file 14991206]

## Supplementary Material

Table SI1: Micronutrient status of WZ+ subjects and Negative controls.

| Micronutrient Marker         | WZ+                |                       | WZ-                |                       |
|------------------------------|--------------------|-----------------------|--------------------|-----------------------|
|                              | Lower <sup>a</sup> | Elevated <sup>b</sup> | Lower <sup>a</sup> | Elevated <sup>b</sup> |
| <b>Extracellular Markers</b> |                    |                       |                    |                       |
| Vitamin A Serum              | 5/270(1.9%)        | 48/270(17.7%)         | 0/29(0%)           | 7/29(24.1%)           |
| Vitamin B1 Serum             | 55/270(20.4%)      | 7/270(2.6%)           | 7/29(24.1%)        | 3/29(10.3%)           |
| Vitamin B2 Serum             | 82/270(30.4%)      | 1/270(0.4%)           | 1/29(3.1.0%)       | 0/29(0%)              |
| Vitamin B3 Serum             | 10/270(3.7%)       | 4/270(1.5%)           | 4/29(3.44%)        | 1/29(3.4%)            |
| Vitamin B5 Serum             | 3/270(1.1%)        | 15/270(5.6%)          | 15/29(3.44%)       | 5/29(17.2%)           |
| Vitamin B6 Serum             | 10/270(3.7%)       | 2/270(0.7%)           | 0/29(0%)           | 0/29(0%)              |
| Vitamin B12 Serum            | 2/277(0.7%)        | 43/277(15.5%)         | 0/35(0%)           | 8/35(22.9%)           |
| Vitamin C Serum              | 52/270(19.3%)      | 16/270(5.9%)          | 16/29(13.8%)       | 1/29(3.4%)            |
| Vitamin D3 Serum             | 115/270(42.6%)     | 1/270(0.4%)           | 1/29(44.2%)        | 0/29(0%)              |
| Vitamin D, 25-OH Serum       | 66/284(23.2%)      | 2/284(0.7%)           | 7/35(20%)          | 0/35(0%)              |
| Vitamin E Serum              | 7/270(2.6%)        | 8/270(3.0%)           | 0/29(0%)           | 1/29(3.4%)            |
| Vitamin K1 Serum             | 23/270(8.5%)       | 1/270(0.4%)           | 1/29(13.8%)        | 0/29(0%)              |
| Vitamin K2 Serum             | 236/270(87.4%)     | 0/270(0%)             | 0/29(89.7%)        | 0/29(0%)              |
| Folate Serum                 | 2/277(0.7%)        | 27/277(9.7%)          | 27/35(7.2%)        | 3/35(8.5%)            |
| Calcium Serum                | 9/279(3.2%)        | 26/279(9.3%)          | 26/35(2.9%)        | 2/35(5.7%)            |
| Manganese Serum              | 0/270(0%)          | 16/270(5.9%)          | 16/29(0%)          | 0/29(0%)              |
| Magnesium Serum              | 0/279(0%)          | 2/279(0.7%)           | 2/34(0%)           | 0/34(0%)              |
| Zinc Serum                   | 62/270(23.0%)      | 1/270(0.4%)           | 1/29(17.2%)        | 0/29(0%)              |
| Copper Serum                 | 10/270(3.7%)       | 7/270(2.6%)           | 7/29(6.9%)         | 0/29(0%)              |
| Chromium Serum               | 58/270(21.5%)      | 8/270(3.0%)           | 8/29(10.3%)        | 1/29(3.4%)            |
| Iron Serum                   | 17/277(6.1%)       | 22/277(7.9%)          | 22/36(2.7%)        | 2/36(5.6%)            |
| Asparagine Serum             | 39/270(14.4%)      | 6/270(2.2%)           | 6/29(14.0%)        | 2/29(6.9%)            |
| Glutamine Serum              | 11/270(4.1%)       | 22/270(8.1%)          | 22/29(3.4%)        | 3/29(10.3%)           |
| Serine Serum                 | 7/270(5.6%)        | 49/270(18.1%)         | 49/29(0%)          | 8/29(27.6%)           |
| Choline Serum                | 13/270(4.8%)       | 18/270(6.7%)          | 18/29(3.4%)        | 3/29(10.3%)           |

|                              |                |                |              |              |
|------------------------------|----------------|----------------|--------------|--------------|
| Inositol Serum               | 15/270(5.6%)   | 18/270(6.7%)   | 18/29(3.4%)  | 2/29(6.9%)   |
| Sodium Serum                 | 11/281(3.9%)   | 24/281(8.5%)   | 24/36(5.6%)  | 5/36(13.8%)  |
| Potassium Serum              | 1/278(0.4%)    | 11/278(4.0%)   | 11/35(0%)    | 2/35(5.1%)   |
| Carnitine Serum              | 8/270(3.0%)    | 18/270(6.7%)   | 18/29(6.8%)  | 2/29(6.9%)   |
| MMA Serum                    | 0/270(0%)      | 1/270(0.4%)    | 1/29(0%)     | 0/29(0%)     |
| Coenzyme Q10 Serum           | 6/279(2.2%)    | 61/279(21.9%)  | 0/34(0%)     | 15/34(44.1%) |
| Cysteine Serum               | 89/270(33.0%)  | 2/270(0.7%)    | 2/29(20.7%)  | 1/29(3.4%)   |
| Selenium Serum               | 30/270(11.1%)  | 7/270(2.6%)    | 7/29(3.4%)   | 3/29(10.3%)  |
| Glutathione Serum            | 267/270(98.9%) | 1/270(0.4%)    | 29/29(100%)  | 0/29(0%)     |
| <b>Intracellular Markers</b> |                |                |              |              |
| DHA RBC                      | 2/293(0.7%)    | 21/293(7.2%)   | 21/37(0%)    | 3/37(8.1%)   |
| EPA RBC                      | 30/293(10.2%)  | 45/293(15.4%)  | 45/37(2.7%)  | 10/37(27.0%) |
| DPA RBC                      | 84/293(28.7%)  | 11/293(3.8%)   | 11/37(18.9%) | 3/37(8.1%)   |
| Total Omega-3 RBC            | 5/293(1.7%)    | 24/293(8.2%)   | 0/37(0%)     | 3/37(8.1%)   |
| AA RBC                       | 1/293(0.3%)    | 7/293(2.4%)    | 7/37(2.7%)   | 0/37(0%)     |
| LA RBC                       | 6/293(2.0%)    | 81/293(27.6%)  | 81/37(2.7%)  | 12/37(32.4%) |
| Total Omega-6 RBC            | 3/293(1.0%)    | 2/293(0.7%)    | 2/37(2.7%)   | 1/37(2.7%)   |
| Omega-3 Index RBC            | 203/293(69.3%) | 0/293(0%)      | 0/37(64.9%)  | 0/37(0%)     |
| Folate RBC                   | 20/280(7.1%)   | 0/280(0%)      | 0/31(9.7%)   | 0/31(0%)     |
| Iron RBC                     | 15/289(5.2%)   | 2/289(0.7%)    | 2/36(5.6%)   | 0/36(0%)     |
| Magnesium RBC                | 2/290(0.7%)    | 3/290(1.0%)    | 0/36(0%)     | 0/36(1%)     |
| Vitamin A WBC                | 9/277(3.2%)    | 4/277(1.4%)    | 0/30(0%)     | 1/30(3.3%)   |
| Vitamin B1 WBC               | 82/276(29.7%)  | 73/276(26.4%)  | 73/30(46.7%) | 8/30(26.7%)  |
| Vitamin B2 WBC               | 0/276(0%)      | 136/276(49.3%) | 136/30(0%)   | 15/30(50.0%) |
| Vitamin B3 WBC               | 3/276(1.1%)    | 20/276(7.2%)   | 0/30(0%)     | 1/30(3.3%)   |
| Vitamin B5 WBC               | 7/276(2.5%)    | 132/276(47.8%) | 132/30(3.3%) | 17/30(56.7%) |
| Vitamin B6 WBC               | 28/276(10.1%)  | 65/276(23.6%)  | 65/30(3.3%)  | 10/30(33.3%) |
| Vitamin C WBC                | 13/276(4.7%)   | 22/276(8.0%)   | 22/30(3.3%)  | 1/30(3.3%)   |
| Vitamin D3 WBC               | 9/277(3.2%)    | 89/277(32.1%)  | 89/30(3.3%)  | 10/30(33.3%) |
| Vitamin E WBC                | 2/277(0.7%)    | 27/277(9.7%)   | 0/30(0%)     | 4/30(13.3%)  |
| Vitamin K1 WBC               | 97/277(35.0%)  | 16/277(5.8%)   | 9/30(30.0%)  | 5/30(16.7%)  |
| Vitamin K2 WBC               | 236/277(85.2%) | 5/277(1.8%)    | 5/30(83.3%)  | 1/30(3.3%)   |

|                  |               |               |             |              |
|------------------|---------------|---------------|-------------|--------------|
| Calcium WBC      | 6/267(2.2%)   | 29/267(10.9%) | 29/30(0%)   | 7/30(23.3%)  |
| Manganese WBC    | 1/266(0.4%)   | 51/266(19.2%) | 51/30(0%)   | 11/30(36.7%) |
| Zinc WBC         | 9/266(3.4%)   | 3/266(1.1%)   | 0/30(0%)    | 3/30(10.0%)  |
| Copper WBC       | 29/266(10.9%) | 13/266(4.9%)  | 13/30(3.3%) | 2/30(6.7%)   |
| Chromium WBC     | 0/267(0%)     | 16/267(6.0%)  | 16/30(0%)   | 4/30(13.3%)  |
| Choline WBC      | 1/276(0.4%)   | 9/276(3.3%)   | 0/30(0%)    | 0/30(0%)     |
| Inositol WBC     | 23/276(8.3%)  | 7/276(2.5%)   | 7/30(3.3%)  | 1/30(3.3%)   |
| Carnitine WBC    | 14/276(5.1%)  | 3/276(1.1%)   | 0/30(0%)    | 0/30(0%)     |
| MMA WBC          | 0/276(0%)     | 49/276(17.8%) | 49/30(0%)   | 4/30(13.3%)  |
| Asparagine WBC   | 1/276(0.4%)   | 88/276(31.9%) | 88/30(0%)   | 11/30(36.7%) |
| Glutamine WBC    | 36/276(13.0%) | 7/276(2.5%)   | 7/30(3.3%)  | 1/30(3.3%)   |
| Serine WBC       | 0/276(0%)     | 66/276(23.9%) | 66/30(0%)   | 8/30(26.7%)  |
| Glutathione WBC  | 22/276(8.0%)  | 19/276(6.9%)  | 3/30(10.0%) | 3/30(10%)    |
| Cysteine WBC     | 14/276(5.1%)  | 5/276(1.8%)   | 0/30(0%)    | 0/30(0%)     |
| Selenium WBC     | 1/266(0.4%)   | 35/266(13.2%) | 0/30(0%)    | 9/30(30.0%)  |
| Coenzyme Q10 WBC | 5/277(1.8%)   | 10/277(3.6%)  | 0/30(0%)    | 1/30(3.3%)   |

---

<sup>a</sup> Lower – lower than the reference range., <sup>b</sup>Elevated – Greater than the reference range, RBC- Red Blood Cells, WBC – White Blood Cells
